# A role for the *Fem-1* gene of *Drosophila melanogaster* in adult courtship

Miles Thies, Brett Berke

<sup>1</sup>Truman State University, Kirksville, MO 63501

The *Fem* family of genes influences sex determination and/or the development of sex-specific characteristics in a wide variety of organisms. Here, we describe the first mutational analysis of the *Fem-1* gene of *Drosophila melanogaster*. The amino acid sequence of the two *Drosophila Fem-1* transcripts are moderately conserved compared to that of both *Fem-1* in *C. elegans* and the two *Fem-1* transcripts in humans, with multiple ankyrin repeats. Using two transposon-induced mutations of *Drosophila Fem-1*, we observed striking defects in adult courtship behavior that are attributed to defects in male courting as opposed to female receptivity. Specifically, viable *Fem-1* mutant males courted *Fem-1* females more vigorously with an increased amount of chasing and singing than pairs of control flies. Nevertheless, *Fem-1* males did not copulate at a higher frequency than controls. The above courtship defects persisted when *Fem-1* males courted control females, but no phenotypes were observed when control males courted *Fem-1* females. Our results indicate that *Drosophila Fem-1* may interact with other genes involved in courtship and sex determination. Additional analyses of these *Fem-1* alleles will help address the nature of these mutations, deepen our molecular understanding of courtship, and contribute to the evolutionary relationships among this highly conserved gene family.

**Abbreviations:** EP 2065 – enhancer-promoter insert 2065; *0166-G4* – *Fem-1*<sup>0166-G4</sup>; *w*<sup>1118</sup> – white mutation, allele 1118, genetic control; Abbreviation 3 Goes Here; A4GH – Abbreviation 4 Goes Here

**Keywords:** *Drosophila*; adult courtship; *Fem-1*; insulin; Key Word 5; Key Word 6

---

## Introduction

The *Fem-1* gene was first identified in *Caenorhabditis elegans*, where it plays a vital role in the development of male worms (Doniach & Hodgkin, 1984) through the ubiquitination and degradation of sex-determining proteins (Chan et al., 2000; Spence et al., 1990; Starostina et al., 2007). The *Fem-1* gene family is highly conserved across a variety of animal phyla, and it is implicated in sexual development in porifera (Perović-Ottstadt et al., 2004), arthropods (Galindo-Torres et al., 2019; Koch et al., 2014; Ma et al., 2012; Montana & Littleton, 2006; Rahman et al., 2016; Shulman &

Feany, 2003), mollusks (Teaniuraitemoana et al., 2014), and chordates (Chan et al., 2000; Galindo-Torres et al., 2019; Gilder et al., 2013; Krakow et al., 2001; Lu et al., 2005a; Oyhenart et al., 2005; Qin et al., 2019; Shi et al., 2011; T. Ventura-Holman & Maher, 2000; T. Ventura-Holman et al., 1998; Tereza Ventura-Holman et al., 2003; Wang et al., 2008). *Fem-1* proteins are highly expressed in neural tissues (T. Ventura-Holman & Maher, 2000). *Drosophila* ModEncode) and have also been implicated in a few neuronal processes. The insulin signaling that is

critical for neuronal growth is regulated by *Fem-1B* mutations in mice (Lu et al., 2005a). *Fem-1* modulates neurodegeneration caused by over-expression of the Tao protein in a *Drosophila* model of Alzheimer's disease (Shulman & Feany, 2003). In addition, the mouse hippocampus increases expression of *Fem-1C* in response to ischemia (Jin et al., 2001).

Despite its strong evolutionary conservation and its expression in the fruit fly *Drosophila melanogaster*, the *Fem-1* gene of flies has never been examined for a role in adult courtship behaviors. The fly is a versatile model to understand the genetic basis of courtship because of its short life cycle, the ease with which flies can be maintained, and the extensive collection of mutations and genetic tools. Courtship behaviors produced by male flies are fixed action patterns (Villella & Hall, 2008), as they are genetically determined and relatively invariant between wild-type (WT) flies. When genetic mutations disrupt this stereotypy, the underlying causes can sometimes be traced back to effects on central neuron development (Yamamoto & Koganezawa, 2013). Genetic dissection of adult courtship indicates that a complex hierarchy of sex determination genes regulates sex-specific neuronal development and behavior (Yamamoto et al., 2014).

Courtship begins when the male fly orients his body towards the female. He may then tap her with a foreleg, sing to her by vibrating one wing (called a courtship song), chase after her, and lick her genitalia. Throughout this process, the female runs away from the male, but if she is eventually receptive, she will allow copulation. Mutational analyses have identified novel genes involved in courtship, helping to link alterations in neural circuitry with changes to the courtship program (Demir & Dickson, 2005; Finley et al., 1997; Shirangi et al., 2013, 2016; Zanini et al., 2012). Mutational

analyses can also uncover the neurons that are necessary for distinct elements of the fixed action pattern of courtship behaviors (Kimura et al., 2008). While adult courtship has been extensively studied, recent findings indicate a surprising amount of complexity left to discover. For example, courtship behaviors may be influenced by circadian control (Fujii et al., 2017) and this fixed action pattern is sensitive to a variety of modulators (Ellenderson & von Philipsborn, 2017; Kim et al., 2017).

Here, we characterize the *Fem-1* gene in adult courtship behavior. We studied the effects of two *Fem-1* alleles and found that these mutants court more intensely than controls, without any change in copulation frequency. Our phenotypic analysis of *Fem-1* indicates both an evolutionarily conserved role in sex determination. The results lay a foundation for understanding how *Fem-1* interacts with well-studied courtship genes and the molecular mechanisms of the courtship phenotypes.

## Material and Methods

### Genetics

All fly stocks were raised at room temperature (about 21°C). The *0166-G4* ( $w^{1118}; PBac\{IT.GAL4\}Fem-1^{0166-G4}$ ) and *EP 2065* ( $w^{1118}; P\{EP\}Fem-1^{EP2065}$ ) stocks were obtained from Bloomington Drosophila Stock Center (Department of Biology, Indiana University, Bloomington, IN, USA). The transposable element for the *EP 2065* allele is inserted into the 5' UTR of the *Fem-1a* transcript and the insert for the *0166-G4* allele is located within the first intron of the *Fem-1a* transcript. The  $w^{1118}$  stock was used as the genetic control for the two mutant alleles since both transposons were inserted into this genetic background. Amino acid sequence alignment of *Fem-1* proteins was done using the online multiple

sequence alignment tool Clustal Omega (Sievers et al., 2011).

### *Courtship assay*

Single choice courting assays were performed at room temperature in a courting chamber made from plastic well plates (cut to 3mm in depth, 9mm diameter) covered with a glass coverslip. Courting chambers were lit from beneath using a lightbox. Before a courtship assay, the chamber was washed with 90% ethanol, left to dry for 5 minutes, washed with distilled water, and dried again. Male flies were collected 0-4 hours after eclosion and stored individually in vials with fly food for 4 days. Newly-eclosed female virgins were identified by the presence of a meconium and were stored at up to 10 virgins per vial with fly food for 4 days. For each courtship assay, a male fly was introduced into the courting chamber using a mouth aspirator and left to acclimate for 5 minutes. A female fly was then introduced into the chamber with the aspirator and the pair was then observed for 10 minutes. A camcorder (Sony HDR-CX405; Sony, New York, NY) was used to collect video recordings that were later analyzed by eye and using a MATLAB program (MathWorks, Natick, MA).

### *Courtship analysis*

Video recordings of courtship assays were manually reviewed and times were noted when the male fly was interacting, singing, chasing, or copulating. Interacting was a broad category used for any time the male was orienting, tapping, or licking, as it was generally difficult to distinguish between these individual behaviors. Courtship initiation was defined as the first instance in which the male engaged in any courtship behavior. The courtship vigor index was defined as the fraction of time the male spent interacting, chasing, or singing from initiation until successful copulation or

the end of the 10 min observation period. The singing/chasing index was defined as the fraction of time the male spent singing/chasing during the entire observation period. The copulation percentage for each allele was defined as the percentage of mating pairs that initiated copulation during the observation period. Statistical comparisons of courtship indices were done using a Welch-t test assuming unequal variances in Microsoft Excel (Microsoft Corporation, Redmond, WA). The copulation percentages for each allele were compared using a chi-squared test in Microsoft Excel.

### *Adult fly path length analysis*

Video recordings of courting flies were analyzed using a MATLAB script (available upon request) that determined the total distance travelled by the courting flies during the observation period. This MATLAB script is based upon a previous video analysis system (Iyengar et al., 2012). During analysis, a graphical user interface prompts a user to input a region of interest, initial coordinates, and an intensity threshold for the conversion of each frame into a black-and-white image. The program then iterates through all frames, calculates the centroid of both flies, and identifies the male and female centroid by minimizing the distance travelled by each fly since the last frame. Once the analysis is complete, the user is then prompted to input the coordinates of the male fly for all frames where the sexes couldn't be determined due to the flies overlapping in preceding frames.

### *Fly Size Analysis*

Before beginning these experiments, new fly stocks of all strains were made to ensure that all flies developed in similar environments. Briefly, adult flies were collected up to 6 hours after eclosion, separated based on sex, and then stored in

vials with fly food for up to 4 days. For the  $w^{1118}$  and *0166-G4* stocks, 15 males and 15 females were transferred to a new vial with fly food and a small, autoclaved piece of paper towel. Because the *EP 2065* stock was generally less healthy than the other stocks, 20 males and 20 females were used for this strain. About 10 days after these stocks were set, new adult flies began to eclose. These flies were collected up to 6 hours after eclosion, separated based on sex, and then stored in vials with fly food for 2-3 days. The flies were then anesthetized using diethyl ether (Fischer Scientific). Photos of the flies' wings were taken after their removal. The flies were also arranged with their anterior side facing up and photos of the flies' bodies were captured. These photos were analyzed using an open source MATLAB script to measure the length and area of the flies' wings and bodies ([www.mathworks.com/matlabcentral/fileexchange](http://www.mathworks.com/matlabcentral/fileexchange)).

## Results

### *Drosophila Fem-1* and its evolutionary conservation

The *Drosophila Fem-1* gene (Figure 1A) encodes two uncharacterized proteins: Fem-1a and Fem-1b. Both of these proteins (Figure 1B) have ankyrin repeat-containing domains, which mediate protein-protein interactions (Li et al. 2006). The percent identity between *Drosophila Fem-1* and its homologous proteins in *C. elegans*, humans, and mice shows moderate conservation in amino acid sequence throughout the entirety of the protein (Figure 1C). The *Fem-1* alleles used in this study (*EP 2065* and *0166-G4*) result from transposons inserted near the N-terminus of the gene (Figure 1A), and their effects on the *Fem-1* mRNA and protein are unknown.

*Mutations in Fem-1 result in increased courtship intensity with no change in copulation rate*

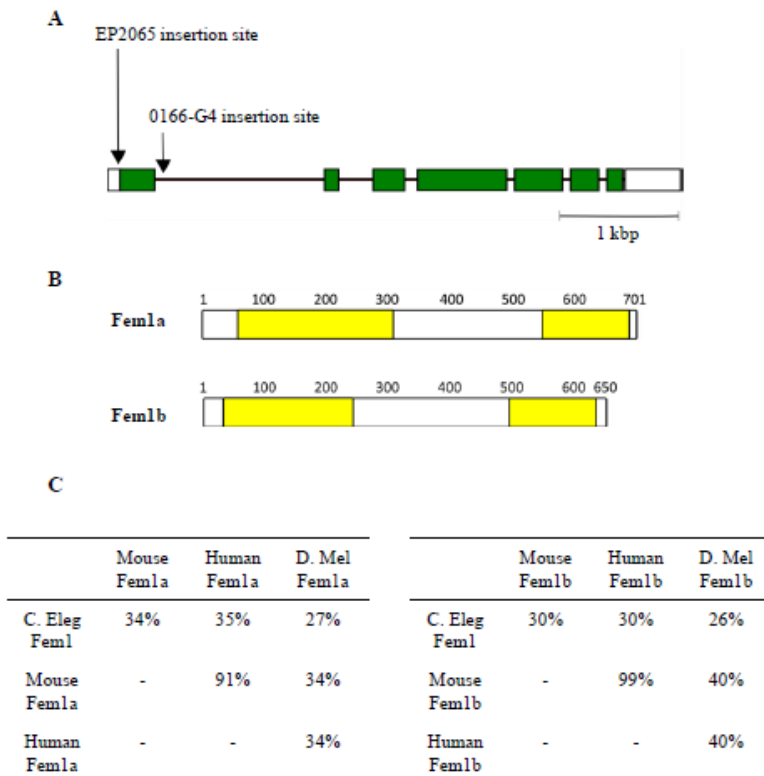

**Figure 1** The *Fem-1* gene encodes a conserved protein in *Drosophila*, *C. elegans*, humans, and mice. (A) Model of the *Fem-1* gene in *Drosophila*. Exons are shown in green and untranslated regions in white. The insertion site of the transposable elements is shown for the two *Fem-1* alleles used here: *EP2065* and *0166-G4*. (B) Model of the Fem-1a and Fem-1b proteins in *Drosophila*. Ankyrin repeat-containing domains, which are known to mediate interactions with other proteins, are shown in yellow. (C) Percent identity matrix for Fem-1 proteins in *Drosophila*, *C. elegans*, humans, and mice.

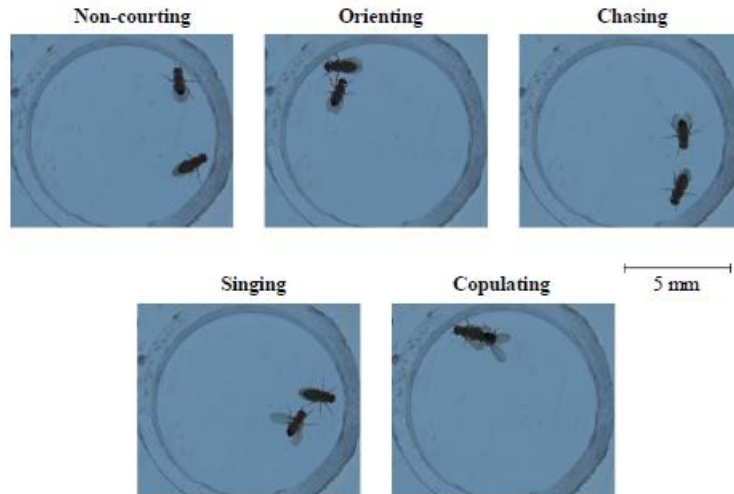

**Figure 2** Representative images of adult courtship in *Drosophila*. Orienting: the male fly will approach and orient its body towards the female. Chasing: the male will chase behind the female. Singing: the male will stretch out and vibrate one wing while orienting towards the female. Copulating: the male will mount the female and complete copulation.

Courtship assays were performed with *0166-G4* male/female, *EP 2065* male/female, and control *w<sup>1118</sup>* male/female pairs. These experiments used previously-isolated male and female virgin flies that were aged 4 days and introduced separately into a small mating chamber. Their stereotyped courtship behaviors over 10 min were then videotaped and analyzed by eye. Sample frames from these videos show orienting, chasing, singing, and copulating flies within the courting chamber (Figure 2). Replay of these videos was used to compute indices for singing and chasing, a courtship vigor index, and a latency to courtship. The measurements (see Methods) were used to characterize the amount of time flies exhibit singing and chasing, two behavioral elements of the courtship repertoire. The courtship vigor index indicates a broader set of behaviors (orienting, tapping, singing, chasing, licking), and together with the latency to courtship, gives a sense of the male's drive to court (Krstic et al., 2009).

Comparisons between the three genotypes revealed a large increase in indices for singing ( $p = 4.8 \times 10^{-9}$ ) and chasing ( $p = 3 \times 10^{-12}$ ) for *0166-G4* pairs and a slight increase for *EP 2065* pairs (singing,  $p = 5.1 \times 10^{-3}$ ; chasing,  $p = 8 \times 10^{-4}$ ; Figure 3A-D). The *0166-G4* allele showed a significant increase in mean courtship vigor

index ( $p = 9.4 \times 10^{-11}$ ), but showed a non-significant trend of shorter mean latencies to courtship initiation. The *EP 2065* allele did not present any significant changes in mean courtship vigor index or latency to courtship. Given the increased courtship observed in both alleles, it was surprising that neither showed a significant increase in the percentage of mating pairs that copulated (Figure 3E). To address the possibility that changes in courtship resulted from changes in overall activity, a MATLAB program was created to measure the distance that each fly walked during the 10min courtship assay. Recordings where the mating pair successfully copulated were not used, as the flies stop moving once copulation begins. On average, the female fly moved a larger distance than the male fly for all genotypes. Both *Fem-1* alleles showed an increase in distance travelled for both sexes as compared to *w<sup>1118</sup>* (*EP 2065*: male,  $p = 5 \times 10^{-6}$ ; female,  $p = 8 \times 10^{-7}$ ; *0166-G4*: male,  $p = 6 \times 10^{-16}$ ; female,  $p = 5 \times 10^{-14}$ ). It is difficult to determine if the increased courtship intensity in *Fem-1* mutants was caused by an overall increase in movement. While the changes in latency until initiation and chasing index could have been influenced by an overall increase in activity, the increased singing index in *Fem-1* mutants suggests that there were alterations to the courtship neural circuitry.

Given the loss of *Fem-1* alters the development of external sexual characteristics in *C. elegans*, we looked for gross structural abnormalities in *Fem-1*

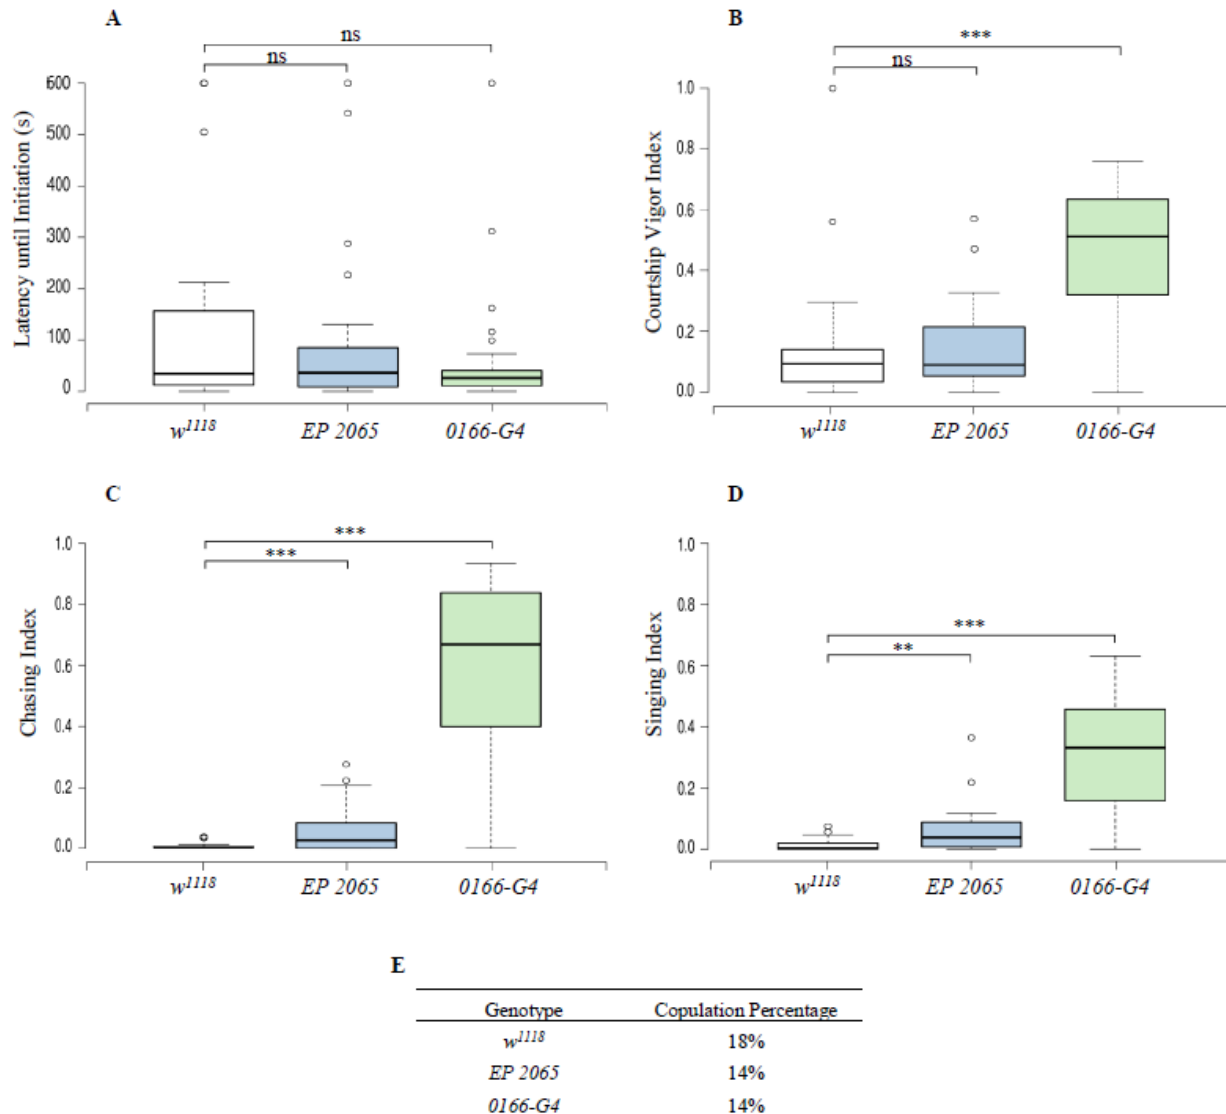

**Figure 3** *Fem-1* mutants show an increase in courting intensity, including singing and chasing, without a similar increase in frequency of copulation. (A) Box plot depicting the mean latency to the initiation of courtship behaviors for the control and the two alleles. Males that did not initiate courtship were assigned a latency of the entire observation period (600 s). There is no change in the mean latency to initiation between control and *Fem-1* mutants. (B) There is a significant increase in mean courting intensity in the *0166-G4* allele. (C) There is a significant increase in mean chasing index for both mutant alleles. (D) There is a significant increase in mean singing index for both mutant alleles. (E) There is no change in percentage of pairs that copulated between the three alleles. For details on how the intensities and indices were calculated, see the Methods. For *w<sup>1118</sup>*, n = 28; *EP 2065*, n = 28; *0166-G4*, n = 29.

mutant male and female flies. Consistent with their ability to mate and their enhanced but otherwise normal courtship preference, we did not observe the loss of sex-specific structures or the switching of external genitalia (Figure 4). The apparently normal development of external sexual structures does not necessarily rule out a role for Fem-

1 in these tissues, but it indicates that the courtship phenotypes in *Fem-1* mutants were likely caused by changes in development of the courtship circuitry within the CNS.

*Some Fem-1-dependent changes in courtship may be sex dependent*

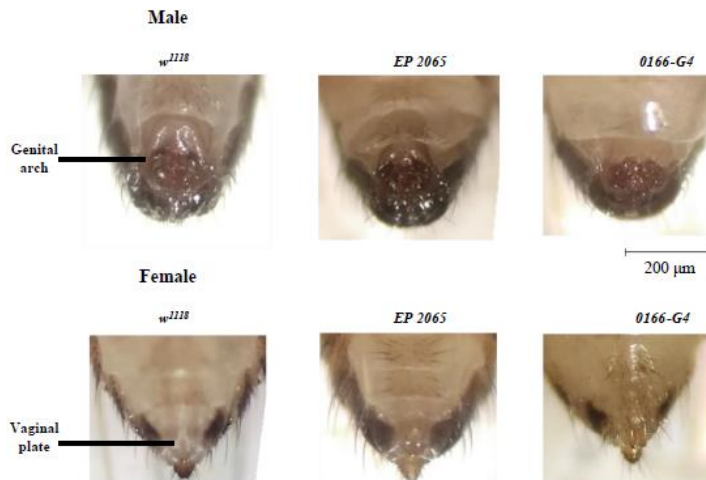

**Figure 4** *Fem-1* mutations do not show obvious changes to the external genitalia of adult flies. The genital arch of the male and vaginal plate of the female are identifiable in *w<sup>1118</sup>* and *Fem-1* mutants. For *w<sup>1118</sup>*: males, n = 12, females, n = 16; *EP2065*: males, n=23, females, n=21; *0166-G4*: males, n=19, females, n = 20.

The characteristics of mating that were quantified in the above data were collected from mutant males, but it is possible that *Fem-1* mutations altered female receptivity, which in turn could affect male behavior. For example, if *Fem-1* females were less receptive while the males mated more vigorously, this might explain the unchanged copulation frequency. We therefore examined whether *Fem-1*

mutations differentially affected male vs female flies. We performed courtship assays with *0166-G4* males / *w<sup>1118</sup>* females and *w<sup>1118</sup>* males / *0166-G4* females, as this allele showed the most striking courtship phenotype. Pairs of *0166-G4* male / *w<sup>1118</sup>* female flies had similar defects to *0166-G4* pairs (Figure 5). Their courtship characteristics differed significantly from *w<sup>1118</sup>* pairs and *w<sup>1118</sup>* male / *0166-G4* female pairs for many of the courtship parameters (compared to *w<sup>1118</sup>*: mean courtship vigor index,  $p = 3 \times 10^{-9}$ ; mean chasing index,  $p = 8 \times 10^{-8}$ ; mean singing index,  $p = 9 \times 10^{-7}$ ; mean latency until initiation,  $p = 0.03$ ; compared to *w<sup>1118</sup>* / *0166-G4*: mean courtship vigor index,  $p = 5 \times 10^{-10}$ ; mean chasing index  $p = 8 \times 10^{-8}$ ; mean singing index  $p = 6 \times 10^{-7}$ ; and mean latency until initiation,  $p = 0.06$ ; Figure 5A-D). In contrast, the *w<sup>1118</sup>* male / *0166-G4* female pairs were only slightly different from *w<sup>1118</sup>*

pairs (courtship vigor index,  $p = 0.018$ ; singing index,  $p = 0.026$ ; chasing index,  $p = 0.5$ ; mean latency until initiation,  $p = 0.6$ ).

While the *Fem-1* females did not affect the courtship of male flies, the mutant female may have affected copulation success. While the percentage of *w<sup>1118</sup>* female / *0166-G4* male pairs copulated was largely unchanged, the *w<sup>1118</sup>* male / *0166-G4* female pairs never copulated during the 10min observations (Figure 5E). Both the *w<sup>1118</sup>* and *0166-G4* control pairs copulated more frequently than the *w<sup>1118</sup>* male / *0166-G4* female pairs (compared to *w<sup>1118</sup>*,  $p = 0.01$ ; compared to *0166-G4*,  $p = 0.01$ ), suggesting that female receptivity may be reduced from control levels. The MATLAB analysis of path length revealed that *0166-G4* male / *w<sup>1118</sup>* female courting pairs were not significantly different from *0166-G4* control pairs, but that *w<sup>1118</sup>* male / *0166-G4* female pairs moved significantly more than *w<sup>1118</sup>* controls (male,  $p = 0.02$ ; female,  $p = 5 \times 10^{-10}$ ). This latter finding might indicate that *Fem-1* mutant females have decreased receptivity due to an overall increased level of movement that is not matched by the control males, leading to normal levels of copulation in mutant pairs and no copulation when the mutant female is courted by a control male.

#### *Fem-1* alleles show alterations in body and wing size of adult flies

As discussed above, *Fem-1* has been implicated in the insulin signaling pathway of mammals (Lu et al. 2005). In *Drosophila*, alterations in environmental factors or

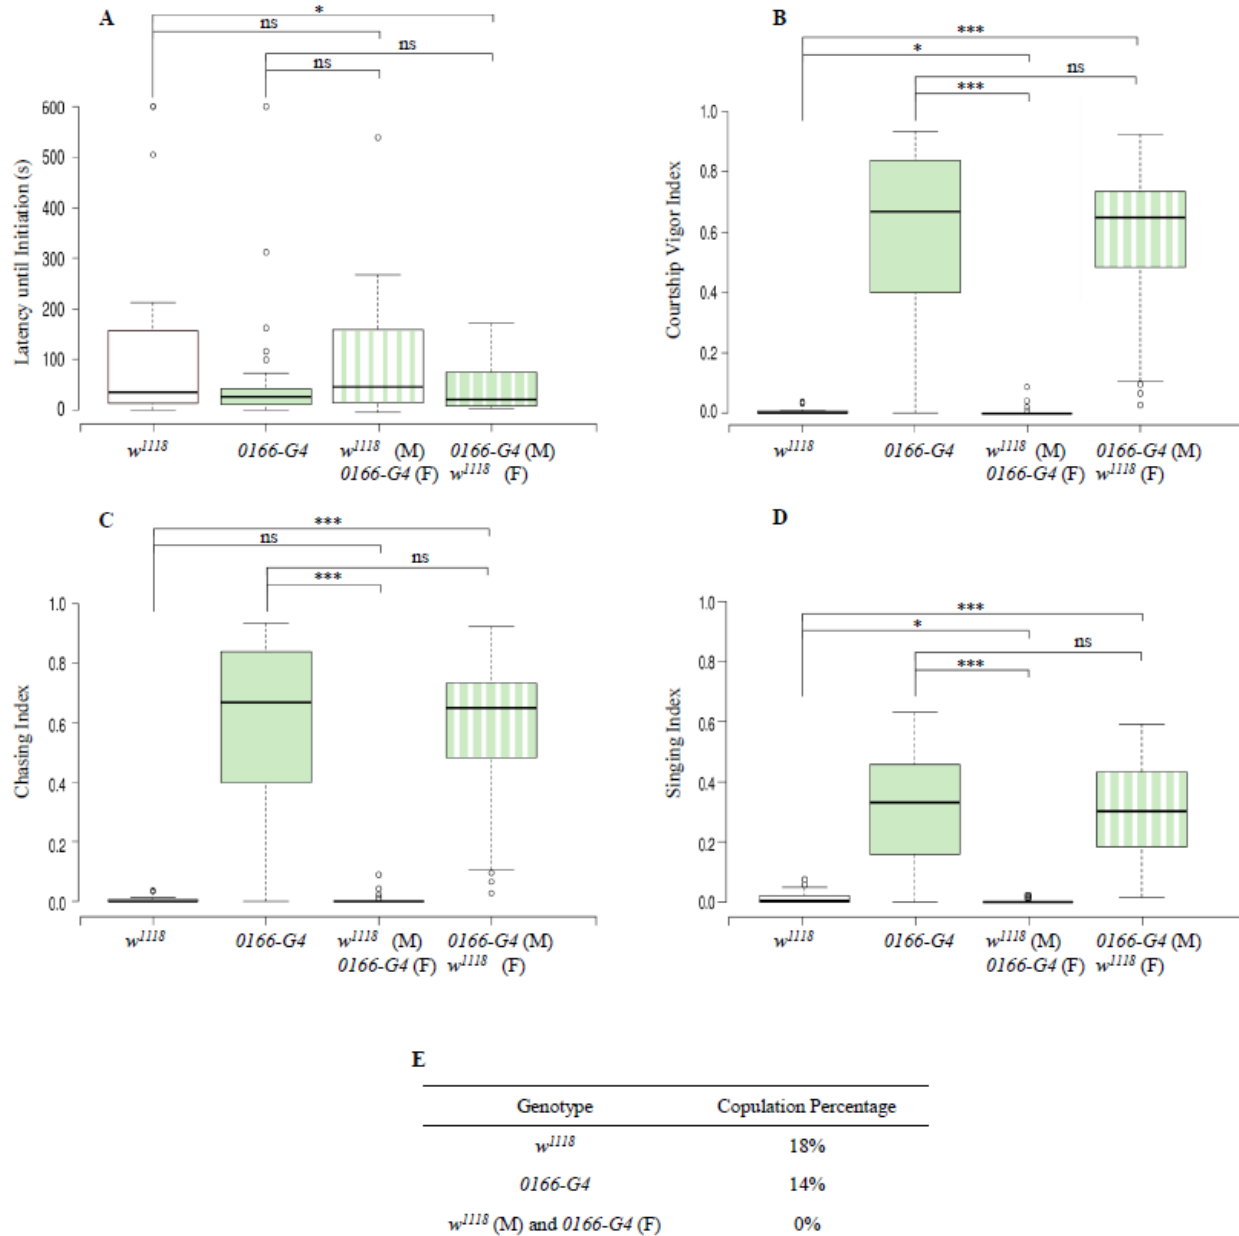

**Figure 5** Courtship intensity is affected by the male's *Fem-1* allele and copulation percentage is affected by the female's *Fem-1* allele copulation. (A) There is little change in the mean latency to initiation between any of the groups. (B) There is a significant increase in mean courtship vigor index between *w<sup>1118</sup>* and *w<sup>1118</sup>* males / *0166-G4* females, but no change between *0166-G4* and *0166-G4* males / *w<sup>1118</sup>* females. (C) Cross genotype groups show no change in mean chasing index from their respective male genotype pairs. (D) There is a significant decrease in mean singing index between *w<sup>1118</sup>* and *w<sup>1118</sup>* males / *0166-G4* females, but no change between *0166-G4* and *0166-G4* males / *w<sup>1118</sup>* females. (E) There is a significant reduction in copulation percentage between *w<sup>1118</sup>* and *w<sup>1118</sup>* males / *0166-G4* females, but no change between *0166-G4* and *0166-G4* males / *w<sup>1118</sup>* females. Intensities and indices were calculated as in Figure 3, see the Methods for details. For *w<sup>1118</sup>*, n = 28; *0166-G4*, n = 29; *w<sup>1118</sup>* male / *0166-G4* female, n = 17; *0166-G4* male / *w<sup>1118</sup>* female, n = 19.

genetic manipulations of the insulin signaling pathway can result in changes in body and wing size (Oldham et al. 2002; Mirth & Shingleton 2012). We therefore used a MATLAB script to measure body

length and wing length/area in the two *Fem-1* mutant flies in comparison to control flies. Body areas were not measured due to difficulties in consistently tracing the body outline in photos with variable lighting



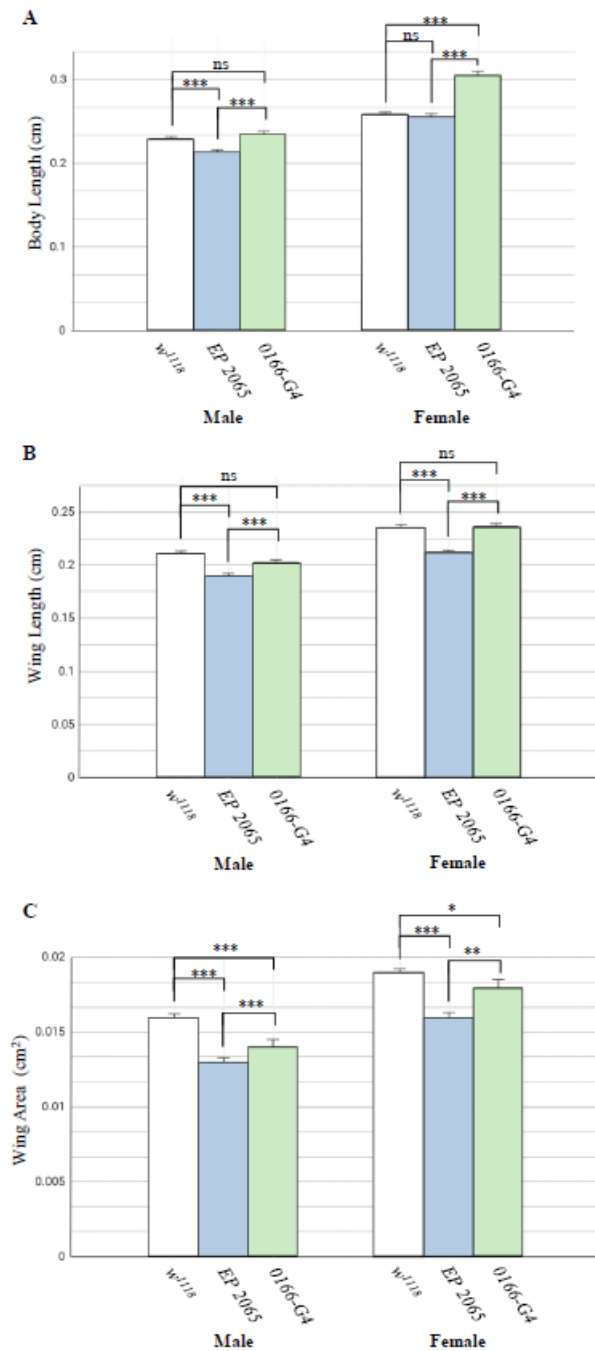

**Figure 6** *Fem-1* mutations alter the body and wing size of adult flies. (A) Female *0166-G4* flies had significantly longer bodies than female *w<sup>1118</sup>* flies, while there were no differences between male *0166-G4* and *w<sup>1118</sup>* flies. There were no differences in body length between female *EP 2065* and *w<sup>1118</sup>* flies, but male *EP 2065* flies had shorter bodies than male *w<sup>1118</sup>* flies. For *w<sup>1118</sup>*: female, n = 19; male, n = 20; *EP 2065*: female, n = 20; male, n = 20; *0166-G4*: female, n = 19; male, n = 18. (B) *EP 2065* flies have significantly shorter wings than *w<sup>1118</sup>* flies, while there is no difference in wing length between *0166-G4* and *w<sup>1118</sup>* flies. For *w<sup>1118</sup>*: female, n = 18; male, n = 15; *EP 2065*: female, n = 20; male, n = 20; *0166-G4*: female, n = 17; male, n = 19. (C) Both *Fem1* alleles have smaller wing areas compared to *w<sup>1118</sup>*. For *w<sup>1118</sup>*: female, n = 19; male, n = 20; *EP 2065*: female, n = 20; male, n = 20; *0166-G4*: female, n = 19; male, n = 18.

differences in body length between female *EP 2065* and *w<sup>1118</sup>* flies. The *0166-G4* allele showed a large increase in female body length ( $p=5 \times 10^{-16}$ ), but no change in males compared to *w<sup>1118</sup>*. Both sexes of *EP 2065* had smaller wing lengths than *w<sup>1118</sup>* flies (male,  $p=4 \times 10^{-5}$ ; female,  $p=3 \times 10^{-7}$ ), while there were no significant differences between the wing lengths of *0166-G4* and *w<sup>1118</sup>* flies. The *EP 2065* and *0166-G4* alleles both had smaller wing areas compared to *w<sup>1118</sup>* flies (*EP 2065*: male,  $p=3 \times 10^{-11}$ ; female,  $p=2 \times 10^{-4}$ ; *0166-G4*: male,  $p=1 \times 10^{-6}$ ; female,  $p=0.05$ ).

## Discussion/Conclusion

This is the first study to investigate a role for the *Fem-1* gene in *Drosophila*. We analyzed two independent *Fem-1* alleles and demonstrate that these alleles overlap in their courtship phenotypes but differ in the extent of these phenotypes (Figures 3 and 5). Considering the importance of *Fem-1* in the sexual development of *C. elegans* and other mammals, it was to be expected that *Fem-1* might influence courtship behavior in *Drosophila*. Cross-genotype experiments demonstrated that the *Fem-1* mutations in the male predominantly determine courting intensity (Figure 3), while the female *Fem-1* allele may affect copulation success (Figure

conditions. We first standardized the rearing conditions and fly age (see Methods), as growth is known to decrease in overcrowded conditions (Pitnick & García-González, 2002). The two *Fem-1* alleles showed different effects on body and wing size (Figure 6). Male *EP 2065* flies had smaller body lengths compared to *w<sup>1118</sup>* males ( $p=3 \times 10^{-6}$ ), but there were no

5). Similarly, the size differences we observed in the adult wing and body might suggest a role for *Fem-1* in tissue growth (Figure 6), consistent with potential effects on insulin signaling as is observed in mice (Lu et al., 2005b; Mirth & Shingleton, 2012; Oldham et al., 2002). To fully characterize the role of *Fem-1* in *Drosophila* courtship and tissue development, more alleles should be investigated using specialized genetic tools (that don't yet exist) such as targeted knockdown of the gene in small subsets of cells and tissues.

Our analysis of *Fem-1* mutants showed that it functions in an evolutionarily conserved manner. We chose these assays based on the assumption that *Drosophila* *Fem-1* would function similar to *Fem-1* in other organisms. The experiments used the available fly strains, and it should be noted that the two alleles have not been assayed for effects on mRNA and protein function. We also did not clean up their genetic backgrounds. Nevertheless, both alleles showed largely similar phenotypes, especially with regard to courtship, which forms the basis of our discussion. Beyond courtship and growth, *Drosophila* provides a wealth of other experimental paradigms with which to examine *Fem-1* function, including several adult and larval behaviors and their underlying neural circuits and a detailed analysis of synapse development at the larval neuromuscular junction (Broadie & Bate, 1995).

#### *Fem-1* may affect sexual development in *Drosophila*

Although the upstream regulatory proteins in the *Drosophila* sex determination cascade are well studied (Pomiankowski, Nöthiger, & Wilkins, 2004), there remain many unidentified downstream effectors such as regulators of Sex lethal, regulation by circadian rhythms, and actions of neuromodulators (Ellenderson & von

Philipsborn, 2017; Kim et al., 2017, Fuji & Amrein 2002; Salz & Erikson 2010; Fujii et al., 2017). Considering the striking change in courtship behavior in *Fem-1* mutants, it is possible that *Fem-1* interacts with components of the sex determination pathway. *Fem-1* has a well-defined role in *C. elegans* sex determination, where *Fem-1* helps to degrade *transformer-1* in male worms (Starostina et al. 2007). However, large differences exist between the genetic mechanisms of sex determination of flies and worms. Sex determination in *Drosophila* is mediated by a cascade of regulated mRNA splicing (Haag & Doty 2005). *Sex-lethal* (*Sxl*) is the genetic switch that determines male or female development in *Drosophila* by regulating the mRNA splicing of the female-specific, *Drosophila* homolog of *transformer-1* (Salz & Erickson, 2010). Given that both *Fem-1* proteins (*Fem-1a* and *Fem-1b*) contain ankyrin-repeats, it is very likely that its interactome could be identified by pulldown or gel-shift assays once an antibody to *Fem-1* is created. An antibody against mouse *Fem-1b* already exists (Lu et al. 2005) and could be useful if it cross reacted with one or both of the transcripts in *Drosophila*.

Drawing comparisons between *Fem-1* mutant phenotypes in *Drosophila* and other sex determination mutants could also be useful. Male courtship behaviors are dependent upon the splicing of the *fruitless* (*fru*) gene, which is differentially spliced between males and females (Demir & Dickson 2005). Mutations that decrease the expression of male-specific *fru* result in decreased courting intensity and null mutations completely disrupt male courting (Anand et al. 2001). *Fem-1* mutants have male-specific phenotypes, so future investigations of *fru* expression and *fru* / *Fem-1* double mutants may indicated protein-protein interactions that affect *fru* signaling. In addition, the *found-in-neurons*

(*fne*) gene encodes an RNA binding protein whose loss of function shows decreased courting intensity, mating frequency, and axonal pathfinding errors during the development of the CNS (Zanini et al. 2012). Double mutant experiments on *Fem-1/fne* could therefore give insight into *Fem-1*'s effect on courting intensity and potential roles in neuronal development. If an RNAi transgene were to be made for *Fem-1*, then tissue-specific expression tools could be used to knock down *Fem-1* in elements of the courtship circuitry (Philipsborn et al. 2011). This would give more insight into what part of the courtship circuit is affected by *Fem-1*.

*Fem-1 may contribute to tissue growth in Drosophila*

*Fem-1* studies in mice have given valuable insight into its role in insulin signaling. *Fem-1* mutations alter the secretion of insulin by pancreatic cells (Lu et al. 2005). The sexual development and insulin secretion defects seen in *Fem-1* mice may be linked in some way, considering that insulin receptors are crucial for genital development and primary sex determination in the mouse (Pitetti et al. 2013). In *Drosophila*, sex determination and insulin signaling could also be linked, since insulin mediates sexual attractiveness (Kuo et al. 2012). While we did not measure insulin levels or insulin receptivity in the *Fem-1* alleles, we did document subtle changes in fly and wing size (Figure 6). It may therefore be useful to examine these *Fem-1* phenotypes in more detail and perhaps in combination with mutations that affect insulin production or signaling.

We have presented a preliminary analysis on the effects of *Fem-1* mutation on courtship, primary sexual characteristics, and growth in *Drosophila*. To characterize the precise role of *Fem-1* in sexual determination and insulin signaling, further

study should be done using specialized genetic tools.

## Acknowledgements

We would like to thank the Berke Laboratory for their constructive comments and the Biology Department at Truman State University for funding this project through Dr. Berke's start-up funds and a TruScholar award to M. Thies.

## Corresponding Author

Dr. Brett Berke  
Biological Sciences  
Truman State University  
100 E. Normal Street  
Kirksville, MO 63501  
bberke@truman.edu

## References

- Broadie K, Bate M (1995) The *Drosophila* NMJ: a genetic model system for synapse formation and function. *Seminars in Developmental Biology* 6:221–231.
- Chan SL, Yee KS, Tan KM, Yu VC (2000) The *Caenorhabditis elegans* sex determination protein FEM-1 is a CED-3 substrate that associates with CED-4 and mediates apoptosis in mammalian cells. *J Biol Chem* 275:17925–17928.
- Demir E, Dickson BJ (2005) fruitless Splicing Specifies Male Courtship Behavior in *Drosophila*. *Cell* 121:785–794.
- Doniach T, Hodgkin J (1984) A sex-determining gene, *fem-1*, required for both male and hermaphrodite development in *Caenorhabditis elegans*. *Dev Biol* 106:223–235.
- Ellenderson BE, von Philipsborn AC (2017) Neuronal modulation of *D. melanogaster* sexual behaviour. *Curr Opin Insect Sci* 24:21–28.
- Finley KD, Taylor BJ, Milstein M, McKeown M (1997) dissatisfaction, a gene involved in sex-specific behavior and neural development of *Drosophila melanogaster*. *Proc Natl Acad Sci U S A* 94:913–918.

- Fujii S, Emery P, Amrein H (2017) SIK3-HDAC4 signaling regulates *Drosophila* circadian male sex drive rhythm via modulating the DN1 clock neurons. *Proc Natl Acad Sci USA* 114:E6669–E6677.
- Galindo-Torres P, Ventura-López C, Llera-Herrera R, Ibarra AM (2019) A natural antisense transcript of the *fem-1* gene was found expressed in female gonads during the characterization, expression profile, and cellular localization of the *fem-1* gene in Pacific white shrimp *Penaeus vannamei*. *Gene* 706:19–31.
- Gilder AS, Chen Y-B, Jackson RJ, Jiang J, Maher JF (2013) *Fem1b* promotes ubiquitylation and suppresses transcriptional activity of *Gli1*. *Biochem Biophys Res Commun* 440:431–436.
- Iyengar A, Imoehl J, Ueda A, Nirschl J, Wu C-F (2012) Automated quantification of locomotion, social interaction, and mate preference in *Drosophila* mutants. *J Neurogenet* 26:306–316.
- Jin K, Mao XO, Eshoo MW, Nagayama T, Minami M, Simon RP, Greenberg DA (2001) Microarray analysis of hippocampal gene expression in global cerebral ischemia. *Ann Neurol* 50:93–103.
- Kim SM, Su C-Y, Wang JW (2017) Neuromodulation of Innate Behaviors in *Drosophila*. *Annu Rev Neurosci* 40:327–348.
- Kimura K-I, Hachiya T, Koganezawa M, Tazawa T, Yamamoto D (2008) Fruitless and doublesex coordinate to generate male-specific neurons that can initiate courtship. *Neuron* 59:759–769.
- Koch V, Nissen I, Schmitt BD, Beye M (2014) Independent Evolutionary Origin of *fem* Paralogous Genes and Complementary Sex Determination in Hymenopteran Insects. *PLOS ONE* 9:e91883.
- Krakow D, Sebald E, King LM, Cohn DH (2001) Identification of human *FEM1A*, the ortholog of a *C. elegans* sex-differentiation gene. *Gene* 279:213–219.
- Krstic D, Boll W, Noll M (2009) Sensory Integration Regulating Male Courtship Behavior in *Drosophila*. *PLOS ONE* 4:e4457.
- Lu D, Ventura-Holman T, Li J, McMurray RW, Subauste JS, Maher JF (2005a) Abnormal glucose homeostasis and pancreatic islet function in mice with inactivation of the *Fem1b* gene. *Mol Cell Biol* 25:6570–6577.
- Lu D, Ventura-Holman T, Li J, McMurray RW, Subauste JS, Maher JF (2005b) Abnormal glucose homeostasis and pancreatic islet function in mice with inactivation of the *Fem1b* gene. *Mol Cell Biol* 25:6570–6577.
- Ma K, Qiu G, Feng J, Li J (2012) Transcriptome Analysis of the Oriental River Prawn, *Macrobrachium nipponense* Using 454 Pyrosequencing for Discovery of Genes and Markers. *PLOS ONE* 7:e39727.
- Mirth CK, Shingleton AW (2012) Integrating Body and Organ Size in *Drosophila*: Recent Advances and Outstanding Problems. *Front Endocrinol* 3 Available at: <https://www.frontiersin.org/articles/10.3389/fendo.2012.00049/full> [Accessed April 30, 2019].
- Montana ES, Littleton JT (2006) Expression Profiling of a Hypercontraction-induced Myopathy in *Drosophila* Suggests a Compensatory Cytoskeletal Remodeling Response. *J Biol Chem* 281:8100–8109.
- Oldham S, Stocker H, Laffargue M, Wittwer F, Wymann M, Hafen E (2002) The *Drosophila* insulin/IGF receptor controls growth and size by modulating *PtdInsP3* levels. *Development* 129:4103–4109.
- Oyhenart J, Benichou S, Raich N (2005) Putative Homeodomain Transcription Factor 1 Interacts with the Feminization Factor Homolog *Fem1b* in Male Germ Cells. *Biol Reprod* 72:780–787.
- Perović-Ottstadt S, Cetković H, Gamulin V, Schröder HC, Kropf K, Moss C, Korzhev M, Diehl-Seifert B, Müller IM, Müller WEG (2004) Molecular markers for germ cell differentiation in the demosponge *Suberites domuncula*. *Int J Dev Biol* 48:293–305.
- Pitnick S, García-González F (2002) Harm to females increases with male body size in *Drosophila melanogaster*. *Proc Biol Sci* 269:1821–1828.
- Pomiankowski A, Nöthiger R, Wilkins A (2004) The Evolution of the *Drosophila* Sex-Determination Pathway. *Genetics* 166:1761–1773.
- Qin G, Luo W, Tan S, Zhang B, Ma S, Lin Q (2019) Dimorphism of sex and gonad-development-related genes in male and

- female lined seahorse, *Hippocampus erectus*, based on transcriptome analyses. *Genomics* 111:260–266.
- Rahman NMA, Fu H, Qiao H, Jin S, Bai H, Zhang W, Jiang FW, Liang G, Sun S, Gong Y, Jiang FF, Xiong Y, Wu Y (2016) Molecular cloning and expression analysis of Fem1b from oriental river prawn *Macrobrachium nipponense*. *Genet Mol Res* 15.
- Salz HK, Erickson JW (2010) Sex determination in *Drosophila*. *Fly (Austin)* 4:60–70.
- Shi Y-Q, Liao S-Y, Zhuang X-J, Han C-S (2011) Mouse Fem1b interacts with and induces ubiquitin-mediated degradation of Ankrd37. *Gene* 485:153–159.
- Shirangi TR, Stern DL, Truman JW (2013) Motor control of *Drosophila* courtship song. *Cell Rep* 5:678–686.
- Shirangi TR, Wong AM, Truman JW, Stern DL (2016) Doublesex Regulates the Connectivity of a Neural Circuit Controlling *Drosophila* Male Courtship Song. *Developmental Cell* 37:533–544.
- Shulman JM, Feany MB (2003) Genetic modifiers of tauopathy in *Drosophila*. *Genetics* 165:1233–1242.
- Sievers F, Wilm A, Dineen D, Gibson TJ, Karplus K, Li W, Lopez R, McWilliam H, Remmert M, Söding J, Thompson JD, Higgins DG (2011) Fast, scalable generation of high-quality protein multiple sequence alignments using Clustal Omega. *Molecular Systems Biology* 7 Available at: <https://www.embopress.org/doi/abs/10.1038/msb.2011.75> [Accessed July 17, 2019].
- Spence AM, Coulson A, Hodgkin J (1990) The product of fem-1, a nematode sex-determining gene, contains a motif found in cell cycle control proteins and receptors for cell-cell interactions. *Cell* 60:981–990.
- Starostina NG, Lim JM, Schvarzstein M, Wells L, Spence AM, Kipreos ET (2007) A CUL-2 ubiquitin ligase containing three FEM proteins degrades TRA-1 to regulate *C. elegans* sex determination. *Dev Cell* 13:127–139.
- Teaniniuraitemoana V, Huvet A, Levy P, Klopp C, Lhuillier E, Gaertner-Mazouni N, Gueguen Y, Le Moullac G (2014) Gonad transcriptome analysis of pearl oyster *Pinctada margaritifera*: identification of potential sex differentiation and sex determining genes. *BMC Genomics* 15 Available at: <https://www.ncbi.nlm.nih.gov/pmc/articles/PMC4082630/> [Accessed July 17, 2019].
- Ventura-Holman T, Lu D, Si X, Izevbigie EB, Maher JF (2003) The Fem1c genes: conserved members of the Fem1 gene family in vertebrates. *Gene* 314:133–139.
- Ventura-Holman T, Maher JF (2000) Sequence, organization, and expression of the human FEM1B gene. *Biochem Biophys Res Commun* 267:317–320.
- Ventura-Holman T, Seldin MF, Li W, Maher JF (1998) The murine fem1 gene family: homologs of the *Caenorhabditis elegans* sex-determination protein FEM-1. *Genomics* 54:221–230.
- Villella A, Hall JC (2008) Neurogenetics of courtship and mating in *Drosophila*. *Adv Genet* 62:67–184.
- Wang X, Desai N, Hu Y-P, Price SM, Abate-Shen C, Shen MM (2008) Mouse Fem1b interacts with the Nkx3.1 homeoprotein and is required for proper male secondary sexual development. *Dev Dyn* 237:2963–2972.
- Yamamoto D, Koganezawa M (2013) Genes and circuits of courtship behaviour in *Drosophila* males. *Nat Rev Neurosci* 14:681–692.
- Yamamoto D, Sato K, Koganezawa M (2014) Neuroethology of male courtship in *Drosophila*: from the gene to behavior. *J Comp Physiol A Neuroethol Sens Neural Behav Physiol* 200:251–264.
- Zanini D, Jallon J-M, Rabinow L, Samson M-L (2012) Deletion of the *Drosophila* neuronal gene found in neurons disrupts brain anatomy and male courtship. *Genes, Brain and Behavior* 11:819–827.
